# Supplementary material for: Influence of Extraction Techniques and Solvents on the Antioxidant and Biological Potential of Different Parts of Scorzonera undulata
Source: MDPI journal article supplement (doi:10.3390/life13040904), 2023-03-29
Supplement: s1 [file life-2275471-supplementary.pdf › life-2275471-supplementary.pdf]

# Influence of Extraction Techniques and Solvents on the Antioxidant and Biological Potential of Different Parts of *Scorzonera undulata*

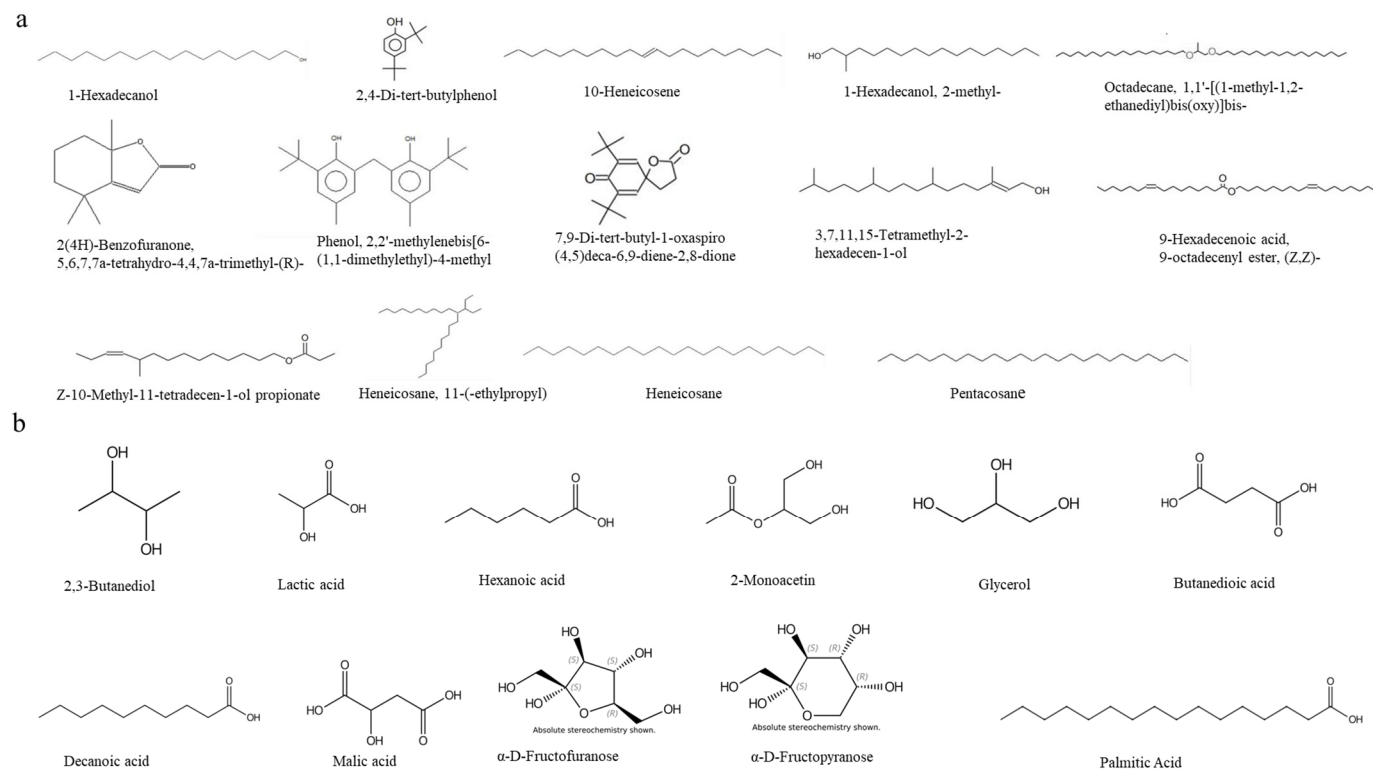

**Supplementary Figure S1:** Structure of compounds identified in *S. undulata* extract by GC-MS before (a) and after (b) derivatization.

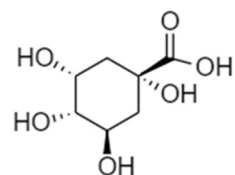

Quinic acid

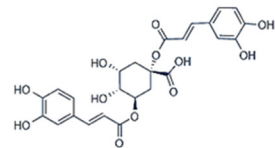

1,3-dicaffeoylquinic acid

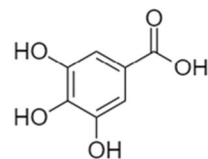

Gallic acid

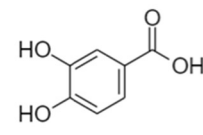

Protocatechuic acid

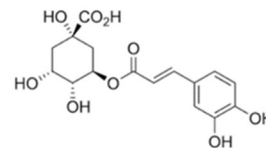

Chlorogenic acid

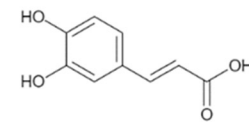

Caffeic acid

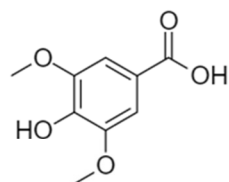

Syringic acid

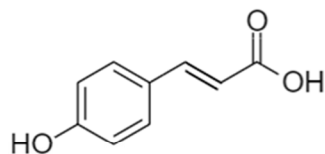

p-coumaric acid

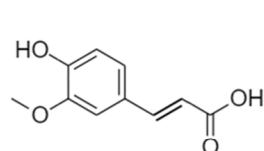

Ferulic acid

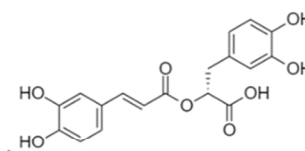

Rosmarinic acid

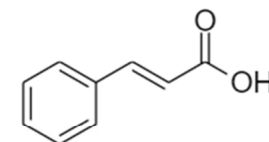

Cinnamic acid

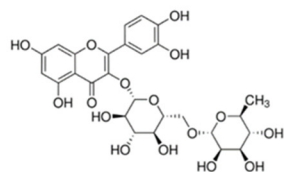

Rutin

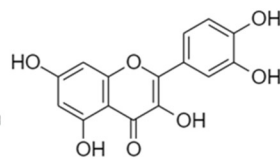

Quercetin

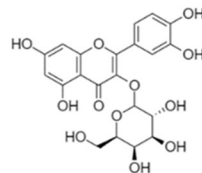

Hyperoside

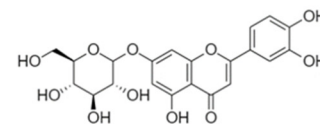

Luteolin-7-O-Glucoside

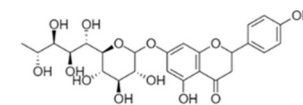

Naringin

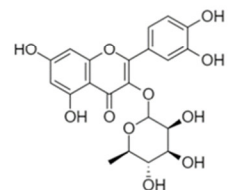

Quercetrin

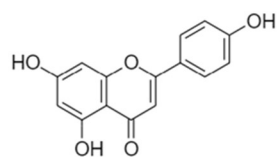

Apigenin

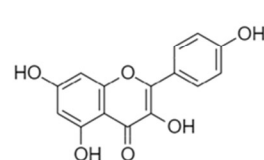

kaempferol

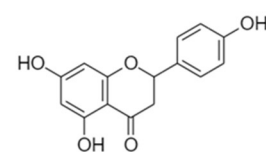

Naringenin

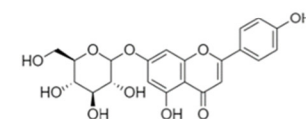

Apigenin-7-O-glucoside

**Supplementary Figure S2:** Structure of compounds identified in *S. undulata* extract by LC-MS.
